# Supplementary material for: The NOD2 receptor is crucial for immune responses towards New World Leishmania species
Source: PubMed Central journal article supplement (PMC5680260; doi:10.1038/s41598-017-15412-7), 2017-11-09
Supplement: 41598_2017_15412_MOESM1_ESM.pdf [file 41598_2017_15412_MOESM1_ESM.pdf]

## The NOD2 receptor is crucial for immune responses towards New World

### *Leishmania* species

Jéssica Cristina dos Santos<sup>1,2</sup>, Michelle S.M.A. Damen<sup>1</sup>, Marije Oosting<sup>1</sup>, Dirk J. de Jong<sup>3</sup>, Bas Heinhuis<sup>1</sup>, Rodrigo Saar Gomes<sup>2</sup>, Carla Santos Araújo<sup>4</sup>, Mihai G. Netea<sup>1,5</sup>, Fátima Ribeiro-Dias<sup>2\*</sup>, Leo A.B. Joosten<sup>1,2\*</sup>

**Supplementary Table 1.** Single-Nucleotide Polymorphisms (SNPs) evaluated in this study.

| Gene          | rs number | Mutation   | Nucleotide change <sup>#</sup> | Amino acid change <sup>#</sup> |
|---------------|-----------|------------|--------------------------------|--------------------------------|
| <i>NOD1</i> * | -         |            | Ins/Del<br>ND1+32656           | Glu796Lys                      |
| <i>NOD2</i>   | rs2066847 | Frameshift |                                | Leu1007insC                    |
| <i>NOD2</i>   | rs2066845 | Missense   | C>G                            | Gly908Arg                      |
| <i>NOD2</i>   | rs2066844 | Missense   | C>T                            | Arg702Trp                      |
| <i>NOD2</i>   | rs9302752 | Unknown    | C>T                            | Unknown                        |
| <i>NOD2</i>   | rs7194886 | Unknown    | C>T                            | Unknown                        |
| <i>NOD2</i>   | rs8057341 | Unknown    | A>G                            | Unknown                        |
| <i>NOD2</i>   | rs2066847 | Frameshift |                                | 3020insC                       |

<sup>#</sup> The first nucleotide (and corresponding amino acid) is the ancestral nucleotide and therefore is considered the wild-type allele.

\*NOD1 insertion/deletion (Ins/Del) polymorphism ND1+32656, partially identified as rs6958571.

### Supplementary Table 2. Primers sequence

GAPDH FW primer: 5'-AGG-GGA-GAT-TCA-GTG-TGG-TG-3'

GAPDH RV primer: 5'-CGA-CCA-CTT-TGT-CAA-GCT-CA-3'

NOD2 FW primer: 5'-CCC-TGC-AGC-TGG-ACT-ACA-ACT-3'

NOD2 RV primer: 5'-AGA-TGC-CTC-GGT-CTG-AGA-TAT-TG-3'

NOD1 FW primer: 5'-AGA-GGC-TCT-GCG-GAA-CCA-3'

NOD1 RV primer: 5'-TGT-GGA-GAT-GCC-GTT-GGA-3'

## **MATERIALS AND METHODS**

### **Human embryonic kidney cell line (HEK)**

HEK-293 cells were cultured in DMEM (Sigma) supplemented with 7.5% fetal bovine serum (Hyclone, Thermo Scientific), 100 U/mL penicillin and 100 µg/mL streptomycin (Invitrogen), at 37°C and 5% CO<sub>2</sub>. Plasmid selecting agent for *NOD2*, 30 µg/mL blasticidin (Invivogen) and 100 µg/mL zeocine were added to the culture medium to ensure presence of this specific *NOD2* receptor in HEK-293 cells. Correct *NOD2* expression was confirmed by Reverse Transcription-polymerase chain reaction (RT-PCR). When 80% of cell confluence was reached, the HEK-293 cells were passaged, counted and used in stimulation experiments.

### **Evaluation of mRNA expression by quantitative real-time PCR (qPCR)**

RNA was precipitated with isopropanol and washed with 75% ethanol followed by reconstitution in RNase-free water. Subsequently, RNA was reverse transcribed into cDNA using the iScript cDNA synthase kit (Bio-Rad). Diluted cDNA was used for qPCR analysis that was performed with the use of the AB StepOnePlus polymerase chain reaction system (Applied Biosystems) with SYBR Green Mastermix (Applied Biosystems).

### **Evaluation of Macrophage infection**

Under a light microscope (1000x), 300 cells were analysed and the percentage of infected cells and the mean number of intracellular parasites per infected cell were determined. Infection index = percentage of infected cells × mean number of parasites per infected cell.

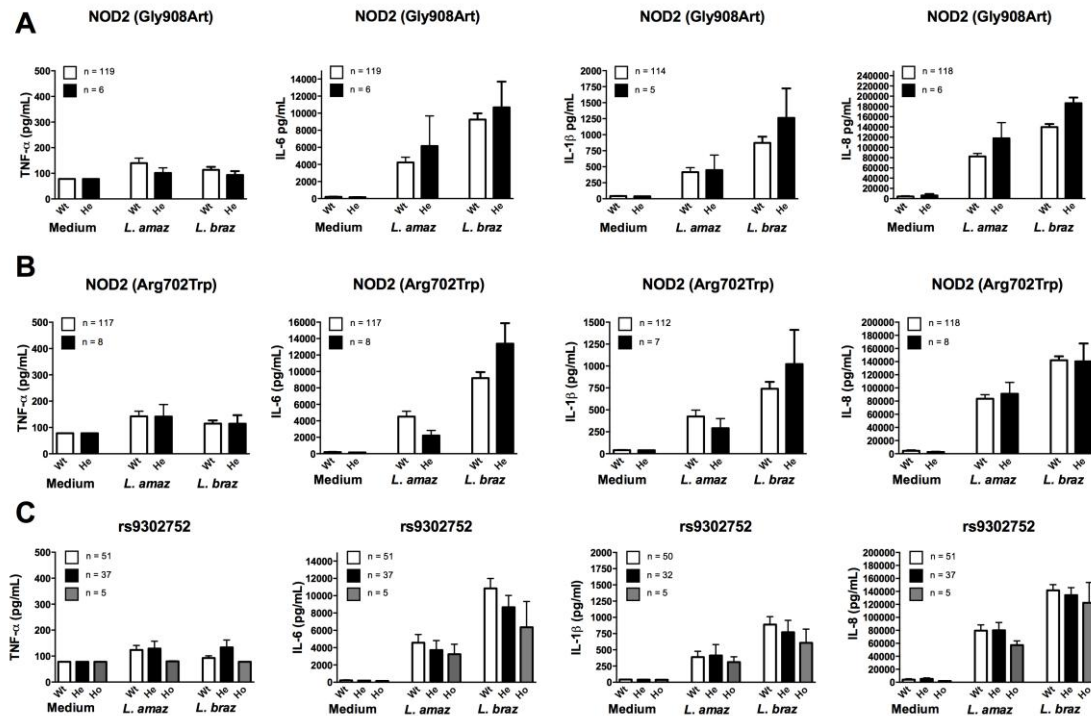

**Figure supplementary 1:** Peripheral blood mononuclear cells (PBMCs,  $5 \times 10^5$  cells/100  $\mu$ L) from healthy individuals genotyped for the *NOD2* were stimulated with different stimuli, including lysates of *Leishmania* parasites (50  $\mu$ g/mL; *L. (L.) amazonensis*: *L. amaz*; *L. (V.) braziliensis*: *L. braz*). TNF $\alpha$ , IL-6, IL-1 $\beta$  and IL-8 concentrations were determined in supernatants by ELISA after 24 h of incubation. The results were stratified for the *NOD2* genotype. Bars represent individuals carrying no SNP (wild type, Wt, white bars), heterozygous SNP carriers (He, black bars), or homozygous variation (Ho, grey bars). Data represent the mean  $\pm$  SEM.

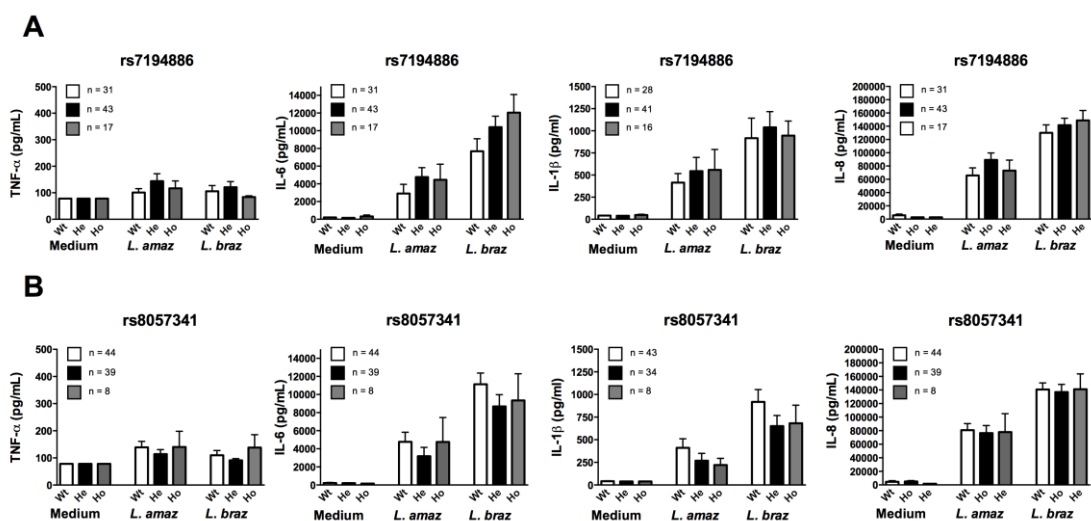

**Figure supplementary 2:** Peripheral blood mononuclear cells (PBMCs,  $5 \times 10^5$  cells/100  $\mu$ L) from healthy individuals genotyped for the *NOD2* were stimulated with different stimuli, including lysates of *Leishmania* parasites (50  $\mu$ g/mL; *L. (L.) amazonensis*: *L. amaz*; *L. (V.) braziliensis*: *L. braz*). TNF $\alpha$ , IL-6, IL-1 $\beta$  and IL-8 concentrations were determined in supernatants by ELISA after 24 h of incubation. The results were stratified for the *NOD2* genotype. Bars represent individuals carrying no SNP (wild type, Wt, white bars), heterozygous SNP carriers (He, black bars), or homozygous variation (Ho, grey bars). Data represent the mean  $\pm$  SEM.

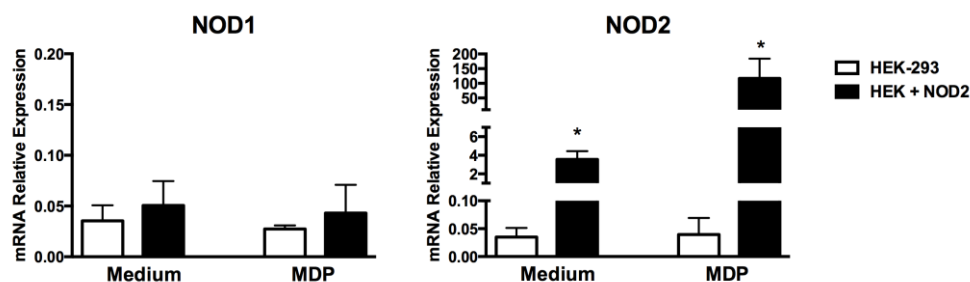

**Figure supplementary 3:** *NOD1* and *NOD2* mRNA expression in embryonic kidney (HEK)-293 cells ( $1 \times 10^6$  cells/100  $\mu$ L) transfected or not with *NOD2*. Cells incubated in the absence (Medium) or presence of MDP (10  $\mu$ g/mL) for 24 h. *NOD1* and *NOD2* mRNA expression were determined by quantitative real-time PCR. Data represent the mean  $\pm$  SEM of three independent experiments, \* $p < 0.05$ ; Unpaired t-test (HEK-293 vs HEK+NOD2).

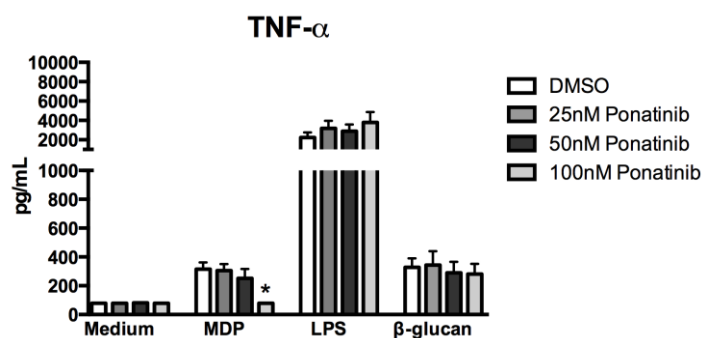

**Figure supplementary 4:** Peripheral blood mononuclear cells (PBMCs,  $5 \times 10^5$  cells/100  $\mu$ L) from healthy individuals were stimulated with MDP (10  $\mu$ g/mL), LPS (10 ng/mL) or  $\beta$ -glucan (5  $\mu$ g/mL) in the absence (white) or presence (grey) of the Ponatinib (25 nM; 50 nM and 100 nM); Medium (non-stimulated cells) and DMSO (vehicle) were included as negative controls. TNF $\alpha$  concentration was determined in supernatants by ELISA, after 24 h of incubation; Data represent the mean  $\pm$  SEM, \* $p < 0.05$ ; (Vehicle vs Ponatinib;  $n = 6$ , in 2 independent experiments done in duplicates, by Wilcoxon test).
